# Supplementary material
Source: PubMed Central journal article supplement (PMC6867476)
Supplement: HBM-37-4615-s001.pdf [file HBM-37-4615-s001.pdf]

|                                  |     | Controls                  | preHD-A versus controls                            | preHD-B versus controls                             | Early HD versus controls                          |
|----------------------------------|-----|---------------------------|----------------------------------------------------|-----------------------------------------------------|---------------------------------------------------|
| <b>Brain volume (VBM)</b>        |     |                           |                                                    |                                                     |                                                   |
| Caudate <sup>s</sup>             |     | 0.5155 (0.5049 to 0.5261) | -0.05 (-0.07 to -0.04; p<0.0001; q<0.0001)         | -0.10 (-0.12 to -0.08; p<0.0001; q<0.0001)          | -0.15 (-0.17 to -0.13; p<0.0001; q<0.0001)        |
| White matter <sup>s</sup>        |     | 0.3176 (0.3128 to 0.3224) | -0.01 (-0.02 to -0.0003; p=0.04; q=0.07)           | -0.01 (-0.02 to -0.003; p=0.004; q=0.006)           | -0.02 (-0.03 to -0.01; p<0.0001; q<0.0001)        |
| Grey matter <sup>s</sup>         |     | 0.4512 (0.4443 to 0.4581) | -0.01 (-0.02 to 0.0001; p=0.05; q=0.07)            | -0.01 (-0.02 to -0.003; p=0.01; q=0.01)             | -0.03 (-0.04 to -0.01; p<0.0001; q<0.0001)        |
| <b>Cortical thickness (mm)</b>   |     |                           |                                                    |                                                     |                                                   |
| Premotor cortex (BA6)            |     | 2.6852 (2.6590 to 2.7114) | 0.001 (-0.05 to 0.05; p=0.97; q=0.97)              | -0.08 (-0.12 to -0.04; p<0.0001; q=0.0003)          | 0.09 (-0.14 to -0.05; p<0.0001; q=0.0006)         |
| Somatosensory cortex (BA2)       |     | 2.2353 (2.2099 to 2.2607) | 0.01 (-0.04 to 0.05; p=0.72; q=0.97)               | -0.04 (-0.07 to -0.01; p=0.02; q=0.04)              | -0.06 (-0.11 to -0.01; p=0.02; q=0.03)            |
| Somatosensory cortex (BA3a)      |     | 1.6850 (1.6598 to 1.7102) | -0.03 (-0.07 to 0.01; p=0.17; q=0.97)              | -0.04 (-0.07 to -0.009; p=0.01; q=0.04)             | -0.07 (-0.11 to -0.03; p=0.0006; q=0.002)         |
| Somatosensory cortex (BA1)       |     | 2.3187 (2.2852 to 2.3522) | -0.00269 (-0.05110 to 0.04572; p=0.9122; q=0.9723) | 0.02364 (-0.1051 to -0.01144; p=0.0152; q=0.0354)   | -0.07925 (-0.1543 to -0.00420; p=0.039; q=0.0545) |
| Somatosensory cortex (BA2)       |     | 2.2353 (2.2099 to 2.2607) | 0.008070 (-0.03636 to 0.05250; p=0.7180; q=0.9723) | -0.04265 (-0.07976 to -0.00554; p=0.0247; q=0.0433) | -0.06331 (-0.1143 to -0.01234; p=0.016; q=0.0279) |
| Motor cortex (BA4a)              |     | 2.6629 (2.6244 to 2.7014) | 0.01463 (-0.05047 to 0.07972; p=0.6557; q=0.9723)  | -0.02544 (-0.07921 to 0.02833; p=0.3506; q=0.4090)  | -0.08815 (-0.1535 to -0.02284; p=0.009; q=0.0210) |
| Motor cortex (BA4b)              |     | 2.4495 (2.4052 to 2.4938) | 0.03572 (-0.03568 to 0.1071; p=0.3224; q=0.9723)   | 0.04015 (-0.01765 to 0.09794; p=0.1718; q=0.2405)   | -0.00184 (-0.07559 to 0.07192; p=0.96; q=0.96)    |
| <b>DTI tractography</b>          |     |                           |                                                    |                                                     |                                                   |
| Motor cortex – motor thalamus    | FA  | 0.4757 (0.4694 to 0.4820) | -0.01 (-0.02 to 0.002; p=0.11; q=0.22)             | -0.01 (-0.02 to -0.003; p=0.01; q=0.02)             | -0.00036 (-0.01 to 0.01; p=0.95; q=0.95)          |
|                                  | RD* | 0.511 (0.506 to 0.517)    | 0.0011 (0.0028 to 0.02; p=0.01; q=0.11)            | 0.019 (0.010 to 0.027; p=0.0001; q=0.0001)          | 0.017 (0.007 to 0.026; p=0.001; q=0.002)          |
|                                  | AD* | 0.713 (0.708 to 0.717)    | 0.021 (-0.01 to 0.016; p=0.11; q=0.22)             | 0.011 (-0.028 to 0.025; p=0.12; q=0.13)             | 0.033 (0.018 to 0.048; p<0.0001; q=0.0002)        |
| Premotor cortex – motor thalamus | FA  | 0.4923 (0.4856 to 0.4990) | -0.01 (-0.02 to 0.002; p=0.10; q=0.22)             | -0.01 (-0.02 to -0.002; p=0.02; q=0.04)             | -0.00285 (-0.01467 to 0.008970; p=0.63; q=0.71)   |
|                                  | RD* | 0.494 (0.488 to 0.499)    | 0.010 (0.0016 to 0.019; p=0.02; q=0.11)            | 0.017 (0.0086 to 0.026; p=0.0001; q=0.0004)         | 0.018 (0.0084 to 0.028; p=0.0006; q=0.001)        |
|                                  | AD* | 1.121 (1.112 to 1.131)    | -0.0015 (-0.02 to 0.013; p=0.80; q=0.89)           | 0.0089 (-0.005 to 0.023; p=0.21; q=0.21)            | 0.032 (0.015 to 0.048; p=0.0003; q=0.0008)        |

|                                         |     |                                 |                                                     |                                                        |                                                     |
|-----------------------------------------|-----|---------------------------------|-----------------------------------------------------|--------------------------------------------------------|-----------------------------------------------------|
| Somatosensory cortex – Sensory thalamus | FA  | 0.4784 (0.4725 to 0.4843)       | -0.005 (-0.02 to 0.006; p=0.35; q=0.5)              | -0.01 (-0.02 to 0.00001; p=0.05; q=0.06)               | 0.003064 (-0.00682 to 0.01294; p=0.53; q=0.66)      |
|                                         | RD* | 0.517 (0.511 to 0.522)          | 0.0082 (-0.001 to 0.017; p=0.08; q=0.22)            | 0.018 (0.0096 to 0.026; p=0.0001; q=0.0001)            | 0.014 (0.005 to 0.023; p=0.003; q=0.004)            |
|                                         | AD* | 1.140 (1.131 to 1.149)          | 0.0048 (-0.0018 to 0.018; p=0.46; q=0.57)           | 0.016 (0.0015 to 0.030; p=0.03; q=0.04)                | 0.036 (0.021 to 0.052; p<0.0001; q<0.0001)          |
| Cortico-spinal tract                    | FA  | 0.5254 (0.5200 to 0.5308)       | -0.004 (-0.01 to 0.005; p=0.39; q=0.52)             | -0.01 (-0.02 to -0.001; p=0.04; q=0.05)                | 0.002152 (-0.00797 to 0.01227; p=0.67; q=0.71)      |
|                                         | RD* | 0.479 (0.474 to 0.484)          | 0.0055 (-0.0025 to 0.014; p=0.17; q=0.31)           | 0.015 (0.0074 to 0.023; p=0.0002; q=0.0004)            | 0.013 (0.0038 to 0.022; p=0.006; q=0.008)           |
|                                         | AD* | 1.175 (1.167 to 1.184)          | 0.000086 (-0.01 to 0.01; p=0.99; q=0.99)            | 0.010 (0.0028 to 0.024; p=0.1219; q=0.13)              | 0.034 (0.019 to 0.050; p<0.0001; q=0.0002)          |
| <b>Dynamic causal modelling</b>         |     |                                 |                                                     |                                                        |                                                     |
| Premotor cortex – Motor thalamus        |     | 0.1853 (0.1470 to 0.2237)       | -0.04206 (-0.1015 to 0.01743; p=0.1631; q=0.6930)   | -0.06057 (-0.1239 to 0.002718; p=0.0604; q=0.5137)     | -0.09966 (-0.1542 to -0.04507; p=0.0005; q=0.0093)  |
| Premotor cortex self-connection         |     | -0.03134 (-0.03444 to -0.02823) | -0.00374 (-0.00855 to 0.001060; p=0.1246; q=0.6930) | -0.00828 (-0.01657 to 0.000006208; p=0.0502; q=0.5137) | -0.00818 (-0.01465 to -0.00170; p=0.0145; q=0.1227) |
| <b>Electrophysiology</b>                |     |                                 |                                                     |                                                        |                                                     |
| SEP N20 latency (ms)                    |     | 19.81 (19.60 to 20.01)          | 0.02 (-0.33 to 0.38; p=0.89; q=0.94)                | 0.54 (0.15 to 0.93; p=0.007; q=0.04)                   | 0.70 (0.23 to 1.16; p=0.004; q=0.04)                |
| SEP N20/P25 amplitude (sqr mV)          |     | 1.87 (0.66 to 3.09)             | 0.07 (-0.13 to 0.27; p=0.46; q=0.84)                | -0.31 (-0.48 to -0.14; p=0.0006; q=0.01)               | -0.27 (-0.43 to -0.11; p=0.001; q=0.03)             |
| <b>Grip force</b>                       |     |                                 |                                                     |                                                        |                                                     |
| Orientation index (log)                 |     | 1.46 (1.39 to 1.54)             | 0.09 (-0.03416 to 0.21; p=0.15; q=0.27)             | 0.06 (-0.05711 to 0.18; p=0.31; q=0.31)                | 0.49 (0.3394 to 0.65; p<0.0001; q<0.0001)           |
| Position index (log)                    |     | 0.47 (0.40 to 0.54)             | 0.07 (-0.05639 to 0.19; p=0.27; q=0.27)             | 0.10 (-0.00314 to 0.20; p=0.057; q=0.17)               | 0.58 (0.4269 to 0.73; p<0.0001; q<0.0001)           |
| Composite index (log)                   |     | 1.93 (1.80 to 2.07)             | 0.16 (-0.08384 to 0.40; p=0.20; q=0.27)             | 0.16 (-0.05186 to 0.37; p=0.14; q=0.21)                | 1.07 (0.7757 to 1.37; p<0.0001; q<0.0001)           |

**Supplementary Table 1.** Individual modality results of variables included in principle component analysis.

|                  | PC1           | PC2          | PC3           | PC4           | PC5           | PC6          | PC7          | PC8    | PC9           | PC10          | PC11   | PC12   | PC13   | PC14   | PC15   |
|------------------|---------------|--------------|---------------|---------------|---------------|--------------|--------------|--------|---------------|---------------|--------|--------|--------|--------|--------|
| SEP amplitude    | 0.242         | -0.412       | -0.282        | 0.185         | 0.100         | 0.174        | <b>0.552</b> | -0.426 | 0.266         | -0.055        | 0.225  | 0.073  | 0.039  | 0.027  | -0.007 |
| SEP latency      | -0.228        | 0.077        | -0.154        | 0.166         | <b>0.645</b>  | <b>0.575</b> | -0.139       | 0.196  | -0.129        | 0.182         | 0.141  | 0.128  | 0.013  | -0.004 | -0.015 |
| PMC – Thalamus   | 0.334         | 0.126        | 0.389         | <b>-0.505</b> | -0.040        | -0.017       | 0.151        | 0.402  | <b>0.431</b>  | 0.169         | 0.180  | 0.176  | 0.019  | 0.015  | 0.038  |
| PMC – PMC        | 0.240         | 0.280        | 0.039         | <b>-0.591</b> | 0.344         | 0.116        | 0.437        | -0.064 | -0.168        | 0.029         | -0.323 | -0.226 | 0.026  | -0.030 | 0.018  |
| S1 - M1          | -0.229        | 0.149        | -0.111        | 0.178         | <b>-0.589</b> | <b>0.637</b> | 0.144        | 0.156  | 0.112         | 0.008         | -0.262 | 0.007  | 0.028  | 0.037  | 0.003  |
| S1 – Thalamus AD | <b>-0.450</b> | <b>0.630</b> | <b>-0.439</b> | 0.080         | -0.014        | -0.238       | 0.205        | 0.101  | 0.120         | 0.062         | 0.001  | 0.083  | 0.012  | -0.169 | -0.195 |
| PMC– Thalamus AD | <b>-0.398</b> | <b>0.588</b> | <b>-0.513</b> | 0.214         | 0.079         | -0.235       | 0.142        | 0.134  | 0.075         | 0.041         | 0.064  | -0.119 | -0.016 | 0.148  | 0.199  |
| PMC– Thalamus RD | <b>-0.460</b> | 0.326        | <b>0.649</b>  | 0.165         | -0.048        | 0.032        | 0.271        | -0.155 | -0.143        | 0.109         | 0.081  | 0.065  | -0.299 | 0.031  | -0.010 |
| S1 – Thalamus RD | <b>-0.406</b> | 0.277        | <b>0.701</b>  | 0.358         | 0.081         | -0.084       | 0.129        | -0.048 | -0.038        | -0.024        | 0.007  | -0.015 | 0.323  | 0.027  | -0.002 |
| BA6 thickness    | <b>0.732</b>  | <b>0.554</b> | -0.027        | 0.015         | -0.021        | 0.039        | -0.155       | -0.134 | 0.022         | 0.098         | 0.055  | -0.106 | 0.009  | 0.242  | -0.168 |
| BA3a thickness   | <b>0.532</b>  | <b>0.592</b> | -0.067        | -0.023        | -0.016        | -0.002       | -0.084       | -0.260 | -0.117        | -0.083        | -0.143 | 0.483  | 0.029  | -0.039 | 0.096  |
| BA2 thickness    | <b>0.578</b>  | <b>0.564</b> | 0.139         | 0.170         | -0.085        | 0.234        | -0.127       | -0.076 | 0.085         | -0.103        | 0.252  | -0.299 | -0.021 | -0.200 | 0.071  |
| GM volume        | <b>0.577</b>  | -0.200       | -0.140        | 0.172         | -0.300        | -0.112       | 0.257        | 0.178  | <b>-0.466</b> | 0.364         | 0.148  | 0.014  | 0.064  | -0.040 | 0.019  |
| WM volume        | <b>0.471</b>  | -0.174       | 0.126         | <b>0.571</b>  | 0.222         | -0.150       | -0.051       | -0.016 | 0.318         | 0.313         | -0.352 | -0.045 | -0.058 | -0.054 | 0.023  |
| Caudate volume   | <b>0.570</b>  | -0.049       | 0.082         | 0.389         | 0.169         | -0.060       | 0.255        | 0.456  | -0.093        | <b>-0.435</b> | -0.049 | 0.050  | -0.069 | 0.033  | -0.041 |

**Supplementary Table 2:** Principal Component (PC) Analysis correlations of the observed variables from all modalities with PCs in Huntington’s disease participants.

|                  | PC1           | PC2           | PC3           | PC4           | PC5          | PC6          | PC7           | PC8           | PC9          | PC10   | PC11          | PC12         | PC13   | PC14   | PC15   |
|------------------|---------------|---------------|---------------|---------------|--------------|--------------|---------------|---------------|--------------|--------|---------------|--------------|--------|--------|--------|
| SEP amplitude    | <b>-0.531</b> | 0.080         | -0.012        | 0.251         | -0.130       | <b>0.547</b> | 0.390         | 0.023         | 0.297        | 0.127  | 0.172         | 0.206        | -0.059 | 0.022  | 0.001  |
| SEP latency      | -0.304        | -0.011        | -0.018        | -0.367        | 0.283        | <b>0.495</b> | -0.453        | <b>0.490</b>  | -0.039       | -0.001 | 0.008         | -0.025       | -0.003 | 0.015  | -0.006 |
| PMC – Thalamus   | 0.352         | -0.077        | <b>0.459</b>  | <b>-0.524</b> | 0.186        | -0.205       | 0.269         | 0.088         | -0.112       | 0.388  | 0.226         | 0.118        | -0.010 | -0.008 | -0.001 |
| PMC – PMC        | 0.204         | 0.255         | 0.122         | 0.086         | <b>0.619</b> | 0.400        | 0.065         | <b>-0.509</b> | -0.228       | 0.042  | -0.044        | -0.091       | -0.005 | -0.017 | 0.001  |
| S1 - M1          | 0.315         | 0.070         | -0.124        | 0.403         | <b>0.534</b> | -0.177       | 0.349         | <b>0.480</b>  | -0.038       | -0.194 | 0.072         | -0.002       | 0.068  | 0.018  | 0.012  |
| S1 – Thalamus AD | <b>0.321</b>  | <b>0.765</b>  | <b>-0.434</b> | -0.167        | -0.049       | 0.029        | 0.086         | 0.049         | 0.147        | 0.063  | -0.039        | -0.004       | 0.112  | -0.166 | -0.125 |
| PMC– Thalamus AD | <b>0.291</b>  | <b>0.712</b>  | <b>-0.499</b> | -0.201        | -0.049       | -0.002       | 0.103         | 0.038         | 0.094        | 0.177  | -0.146        | -0.070       | -0.022 | 0.148  | 0.126  |
| PMC– Thalamus RD | 0.223         | <b>0.498</b>  | <b>0.734</b>  | 0.153         | -0.226       | 0.126        | -0.056        | 0.132         | -0.028       | -0.053 | -0.039        | -0.009       | 0.080  | -0.164 | 0.116  |
| S1 – Thalamus RD | 0.289         | <b>0.647</b>  | <b>0.600</b>  | 0.115         | -0.165       | 0.021        | -0.031        | 0.088         | -0.128       | -0.097 | -0.066        | 0.037        | -0.111 | 0.179  | -0.107 |
| BA6 thickness    | <b>0.854</b>  | -0.182        | -0.173        | -0.073        | -0.066       | 0.124        | 0.068         | 0.069         | 0.043        | -0.139 | 0.047         | -0.064       | -0.369 | -0.096 | 0.011  |
| BA3a thickness   | <b>0.715</b>  | -0.204        | -0.132        | 0.156         | -0.323       | 0.255        | -0.043        | 0.013         | -0.118       | 0.082  | 0.347         | -0.254       | 0.157  | 0.065  | -0.012 |
| BA2 thickness    | <b>0.778</b>  | -0.094        | -0.245        | -0.101        | -0.050       | 0.123        | -0.152        | -0.118        | -0.134       | -0.227 | 0.021         | <b>0.422</b> | 0.110  | 0.030  | 0.026  |
| GM volume        | <b>0.435</b>  | <b>-0.595</b> | 0.045         | 0.109         | -0.138       | 0.231        | 0.228         | 0.177         | -0.132       | 0.254  | <b>-0.448</b> | 0.001        | 0.059  | -0.005 | -0.028 |
| WM volume        | <b>0.452</b>  | -0.271        | 0.400         | -0.299        | 0.146        | 0.066        | 0.091         | -0.106        | <b>0.590</b> | -0.223 | -0.077        | -0.096       | 0.104  | 0.058  | -0.007 |
| Caudate volume   | <b>0.483</b>  | -0.004        | 0.043         | <b>0.463</b>  | 0.217        | -0.145       | <b>-0.483</b> | -0.008        | 0.322        | 0.369  | 0.017         | 0.088        | -0.042 | 0.000  | -0.006 |

**Supplementary Table 3:** Principal Component (PC) Analysis correlations of the observed variables from all modalities with PCs in control participants.
